# Supplementary material for: Circulating Metabolites as Biomarkers of Disease and Pharmacoresistance in Patients with Mesial Temporal Lobe Epilepsy
Source: Preprints.org preprint supplement (doi:10.20944/preprints202203.0314.v1), 2022-03-23
Supplement: Supplementary file 1 [file Supplementary Table 2_genes_overlap.xlsx]

## Sheet: Sheet1
Overlap Results
Collection(s):	HPO
# overlaps shown:	10
# genesets in collections:	5071
# genes in comparison (n):	18
# genes in universe (N):	40786
Gene Set Name	# Genes in Gene Set (K)	Description	# Genes in Overlap (k)	k/K	p-value	FDR q-value
HP_ABNORMALITY_OF_THE_MIDFACE	563	Abnormality of the midface	6	0.0107	1.09e-07	0.000551
HP_ABNORMALITY_OF_GLOBE_LOCATION	957	Abnormality of globe location	6	0.0063	2.4e-06	0.00607
HP_FUNCTIONAL_ABNORMALITY_OF_THE_GASTROINTESTINAL_TRACT	1037	Functional abnormality of the gastrointestinal tract	6	0.0058	3.8e-06	0.00643
HP_MIDFACE_RETRUSION	281	Midface retrusion	4	0.0142	6.25e-06	0.00793
HP_ABNORMAL_PYRAMIDAL_SIGN	378	Abnormal pyramidal sign	4	0.0106	2e-05	0.0166
HP_DERMAL_TRANSLUCENCY	16	Dermal translucency	2	0.125	2.2e-05	0.0166
HP_THIN_VERMILION_BORDER	391	Thin vermilion border	4	0.0102	2.29e-05	0.0166
HP_THORACIC_KYPHOSCOLIOSIS	22	Thoracic kyphoscoliosis	2	0.0909	4.23e-05	0.0267
HP_DOWNSLANTED_PALPEBRAL_FISSURES	477	Downslanted palpebral fissures	4	0.0084	4.96e-05	0.0267
HP_FAILURE_TO_THRIVE	981	Failure to thrive	5	0.0051	5.26e-05	0.0267
Gene/Gene Set Overlap Matrix
Entrez Gene Id	Gene Symbol	Gene Description	HP_ABNORMALITY_OF_THE_MIDFACE	HP_ABNORMALITY_OF_GLOBE_LOCATION	HP_FUNCTIONAL_ABNORMALITY_OF_THE_GASTROINTESTINAL_TRACT	HP_MIDFACE_RETRUSION	HP_ABNORMAL_PYRAMIDAL_SIGN	HP_DERMAL_TRANSLUCENCY	HP_THIN_VERMILION_BORDER	HP_THORACIC_KYPHOSCOLIOSIS	HP_DOWNSLANTED_PALPEBRAL_FISSURES	HP_FAILURE_TO_THRIVE
5831	PYCR1	pyrroline-5-carboxylate reductase 1 [Source:HGNC Symbol;Acc:HGNC:9721]	HP_ABNORMALITY_OF_THE_MIDFACE	HP_ABNORMALITY_OF_GLOBE_LOCATION	HP_FUNCTIONAL_ABNORMALITY_OF_THE_GASTROINTESTINAL_TRACT	HP_MIDFACE_RETRUSION		HP_DERMAL_TRANSLUCENCY	HP_THIN_VERMILION_BORDER		HP_DOWNSLANTED_PALPEBRAL_FISSURES	HP_FAILURE_TO_THRIVE
55699	IARS2	isoleucyl-tRNA synthetase 2, mitochondrial [Source:HGNC Symbol;Acc:HGNC:29685]	HP_ABNORMALITY_OF_THE_MIDFACE	HP_ABNORMALITY_OF_GLOBE_LOCATION	HP_FUNCTIONAL_ABNORMALITY_OF_THE_GASTROINTESTINAL_TRACT	HP_MIDFACE_RETRUSION			HP_THIN_VERMILION_BORDER	HP_THORACIC_KYPHOSCOLIOSIS
178	AGL	amylo-alpha-1, 6-glucosidase, 4-alpha-glucanotransferase [Source:HGNC Symbol;Acc:HGNC:321]	HP_ABNORMALITY_OF_THE_MIDFACE	HP_ABNORMALITY_OF_GLOBE_LOCATION		HP_MIDFACE_RETRUSION			HP_THIN_VERMILION_BORDER
5034	P4HB	prolyl 4-hydroxylase subunit beta [Source:HGNC Symbol;Acc:HGNC:8548]	HP_ABNORMALITY_OF_THE_MIDFACE	HP_ABNORMALITY_OF_GLOBE_LOCATION		HP_MIDFACE_RETRUSION					HP_DOWNSLANTED_PALPEBRAL_FISSURES
29920	PYCR2	pyrroline-5-carboxylate reductase 2 [Source:HGNC Symbol;Acc:HGNC:30262]	HP_ABNORMALITY_OF_THE_MIDFACE	HP_ABNORMALITY_OF_GLOBE_LOCATION			HP_ABNORMAL_PYRAMIDAL_SIGN		HP_THIN_VERMILION_BORDER	HP_THORACIC_KYPHOSCOLIOSIS	HP_DOWNSLANTED_PALPEBRAL_FISSURES	HP_FAILURE_TO_THRIVE
3376	IARS1	isoleucyl-tRNA synthetase 1 [Source:HGNC Symbol;Acc:HGNC:5330]	HP_ABNORMALITY_OF_THE_MIDFACE		HP_FUNCTIONAL_ABNORMALITY_OF_THE_GASTROINTESTINAL_TRACT			HP_DERMAL_TRANSLUCENCY				HP_FAILURE_TO_THRIVE
25973	PARS2	prolyl-tRNA synthetase 2, mitochondrial [Source:HGNC Symbol;Acc:HGNC:30563]		HP_ABNORMALITY_OF_GLOBE_LOCATION	HP_FUNCTIONAL_ABNORMALITY_OF_THE_GASTROINTESTINAL_TRACT		HP_ABNORMAL_PYRAMIDAL_SIGN				HP_DOWNSLANTED_PALPEBRAL_FISSURES	HP_FAILURE_TO_THRIVE
2058	EPRS1	glutamyl-prolyl-tRNA synthetase 1 [Source:HGNC Symbol;Acc:HGNC:3418]			HP_FUNCTIONAL_ABNORMALITY_OF_THE_GASTROINTESTINAL_TRACT		HP_ABNORMAL_PYRAMIDAL_SIGN					HP_FAILURE_TO_THRIVE
8974	P4HA2	prolyl 4-hydroxylase subunit alpha 2 [Source:HGNC Symbol;Acc:HGNC:8547]			HP_FUNCTIONAL_ABNORMALITY_OF_THE_GASTROINTESTINAL_TRACT
587	BCAT2	branched chain amino acid transaminase 2 [Source:HGNC Symbol;Acc:HGNC:977]					HP_ABNORMAL_PYRAMIDAL_SIGN
259307	IL4I1	interleukin 4 induced 1 [Source:HGNC Symbol;Acc:HGNC:19094]
283208	P4HA3	prolyl 4-hydroxylase subunit alpha 3 [Source:HGNC Symbol;Acc:HGNC:30135]
5033	P4HA1	prolyl 4-hydroxylase subunit alpha 1 [Source:HGNC Symbol;Acc:HGNC:8546]
51056	LAP3	leucine aminopeptidase 3 [Source:HGNC Symbol;Acc:HGNC:18449]
56898	BDH2	3-hydroxybutyrate dehydrogenase 2 [Source:HGNC Symbol;Acc:HGNC:32389]
586	BCAT1	branched chain amino acid transaminase 1 [Source:HGNC Symbol;Acc:HGNC:976]
622	BDH1	3-hydroxybutyrate dehydrogenase 1 [Source:HGNC Symbol;Acc:HGNC:1027]
65263	PYCR3	pyrroline-5-carboxylate reductase 3 [Source:HGNC Symbol;Acc:HGNC:25846]
