# Supplementary material for: Circulating Metabolites as Biomarkers of Disease and Pharmacoresistance in Patients with Mesial Temporal Lobe Epilepsy
Source: Preprints.org preprint supplement (doi:10.20944/preprints202203.0314.v1), 2022-03-23
Supplement: Supplementary file 2 [file Supplementary Table 3 _ overlap_gsea_drxrp.xlsx]

## Sheet: Sheet1
Overlap Results
Collection(s):	HPO
# overlaps shown:	10
# genesets in collections:	5071
# genes in comparison (n):	21
# genes in universe (N):	40786
Gene Set Name	# Genes in Gene Set (K)	Description	# Genes in Overlap (k)	k/K	p-value	FDR q-value
HP_ABNORMALITY_OF_THE_MIDFACE	563	Abnormality of the midface	6	0.0107	3.07e-07	0.00155
HP_ABNORMALITY_OF_GLOBE_LOCATION	957	Abnormality of globe location	6	0.0063	6.59e-06	0.0122
HP_ELEVATED_HEPATIC_TRANSAMINASE	256	Elevated hepatic transaminase	4	0.0156	8.34e-06	0.0122
HP_FUNCTIONAL_ABNORMALITY_OF_THE_GASTROINTESTINAL_TRACT	1037	Functional abnormality of the gastrointestinal tract	6	0.0058	1.04e-05	0.0122
HP_MIDFACE_RETRUSION	281	Midface retrusion	4	0.0142	1.2e-05	0.0122
HP_DERMAL_TRANSLUCENCY	16	Dermal translucency	2	0.125	3.02e-05	0.0255
HP_ABNORMAL_PYRAMIDAL_SIGN	378	Abnormal pyramidal sign	4	0.0106	3.84e-05	0.0277
HP_THIN_VERMILION_BORDER	391	Thin vermilion border	4	0.0102	4.38e-05	0.0277
HP_THORACIC_KYPHOSCOLIOSIS	22	Thoracic kyphoscoliosis	2	0.0909	5.8e-05	0.0327
HP_DOWNSLANTED_PALPEBRAL_FISSURES	477	Downslanted palpebral fissures	4	0.0084	9.44e-05	0.0447
Gene/Gene Set Overlap Matrix
Entrez Gene Id	Gene Symbol	Gene Description	HP_ABNORMALITY_OF_THE_MIDFACE	HP_ABNORMALITY_OF_GLOBE_LOCATION	HP_ELEVATED_HEPATIC_TRANSAMINASE	HP_FUNCTIONAL_ABNORMALITY_OF_THE_GASTROINTESTINAL_TRACT	HP_MIDFACE_RETRUSION	HP_DERMAL_TRANSLUCENCY	HP_ABNORMAL_PYRAMIDAL_SIGN	HP_THIN_VERMILION_BORDER	HP_THORACIC_KYPHOSCOLIOSIS	HP_DOWNSLANTED_PALPEBRAL_FISSURES
178	AGL	amylo-alpha-1, 6-glucosidase, 4-alpha-glucanotransferase [Source:HGNC Symbol;Acc:HGNC:321]	HP_ABNORMALITY_OF_THE_MIDFACE	HP_ABNORMALITY_OF_GLOBE_LOCATION	HP_ELEVATED_HEPATIC_TRANSAMINASE		HP_MIDFACE_RETRUSION			HP_THIN_VERMILION_BORDER
5831	PYCR1	pyrroline-5-carboxylate reductase 1 [Source:HGNC Symbol;Acc:HGNC:9721]	HP_ABNORMALITY_OF_THE_MIDFACE	HP_ABNORMALITY_OF_GLOBE_LOCATION		HP_FUNCTIONAL_ABNORMALITY_OF_THE_GASTROINTESTINAL_TRACT	HP_MIDFACE_RETRUSION	HP_DERMAL_TRANSLUCENCY		HP_THIN_VERMILION_BORDER		HP_DOWNSLANTED_PALPEBRAL_FISSURES
55699	IARS2	isoleucyl-tRNA synthetase 2, mitochondrial [Source:HGNC Symbol;Acc:HGNC:29685]	HP_ABNORMALITY_OF_THE_MIDFACE	HP_ABNORMALITY_OF_GLOBE_LOCATION		HP_FUNCTIONAL_ABNORMALITY_OF_THE_GASTROINTESTINAL_TRACT	HP_MIDFACE_RETRUSION			HP_THIN_VERMILION_BORDER	HP_THORACIC_KYPHOSCOLIOSIS
5034	P4HB	prolyl 4-hydroxylase subunit beta [Source:HGNC Symbol;Acc:HGNC:8548]	HP_ABNORMALITY_OF_THE_MIDFACE	HP_ABNORMALITY_OF_GLOBE_LOCATION			HP_MIDFACE_RETRUSION					HP_DOWNSLANTED_PALPEBRAL_FISSURES
29920	PYCR2	pyrroline-5-carboxylate reductase 2 [Source:HGNC Symbol;Acc:HGNC:30262]	HP_ABNORMALITY_OF_THE_MIDFACE	HP_ABNORMALITY_OF_GLOBE_LOCATION					HP_ABNORMAL_PYRAMIDAL_SIGN	HP_THIN_VERMILION_BORDER	HP_THORACIC_KYPHOSCOLIOSIS	HP_DOWNSLANTED_PALPEBRAL_FISSURES
3376	IARS1	isoleucyl-tRNA synthetase 1 [Source:HGNC Symbol;Acc:HGNC:5330]	HP_ABNORMALITY_OF_THE_MIDFACE		HP_ELEVATED_HEPATIC_TRANSAMINASE	HP_FUNCTIONAL_ABNORMALITY_OF_THE_GASTROINTESTINAL_TRACT		HP_DERMAL_TRANSLUCENCY
25973	PARS2	prolyl-tRNA synthetase 2, mitochondrial [Source:HGNC Symbol;Acc:HGNC:30563]		HP_ABNORMALITY_OF_GLOBE_LOCATION		HP_FUNCTIONAL_ABNORMALITY_OF_THE_GASTROINTESTINAL_TRACT			HP_ABNORMAL_PYRAMIDAL_SIGN			HP_DOWNSLANTED_PALPEBRAL_FISSURES
587	BCAT2	branched chain amino acid transaminase 2 [Source:HGNC Symbol;Acc:HGNC:977]			HP_ELEVATED_HEPATIC_TRANSAMINASE				HP_ABNORMAL_PYRAMIDAL_SIGN
3939	LDHA	lactate dehydrogenase A [Source:HGNC Symbol;Acc:HGNC:6535]			HP_ELEVATED_HEPATIC_TRANSAMINASE
2058	EPRS1	glutamyl-prolyl-tRNA synthetase 1 [Source:HGNC Symbol;Acc:HGNC:3418]				HP_FUNCTIONAL_ABNORMALITY_OF_THE_GASTROINTESTINAL_TRACT			HP_ABNORMAL_PYRAMIDAL_SIGN
8974	P4HA2	prolyl 4-hydroxylase subunit alpha 2 [Source:HGNC Symbol;Acc:HGNC:8547]				HP_FUNCTIONAL_ABNORMALITY_OF_THE_GASTROINTESTINAL_TRACT
124637	CYB5D1	cytochrome b5 domain containing 1 [Source:HGNC Symbol;Acc:HGNC:26516]
160287	LDHAL6A	lactate dehydrogenase A like 6A [Source:HGNC Symbol;Acc:HGNC:28335]
259307	IL4I1	interleukin 4 induced 1 [Source:HGNC Symbol;Acc:HGNC:19094]
283208	P4HA3	prolyl 4-hydroxylase subunit alpha 3 [Source:HGNC Symbol;Acc:HGNC:30135]
3945	LDHB	lactate dehydrogenase B [Source:HGNC Symbol;Acc:HGNC:6541]
3948	LDHC	lactate dehydrogenase C [Source:HGNC Symbol;Acc:HGNC:6544]
5033	P4HA1	prolyl 4-hydroxylase subunit alpha 1 [Source:HGNC Symbol;Acc:HGNC:8546]
51056	LAP3	leucine aminopeptidase 3 [Source:HGNC Symbol;Acc:HGNC:18449]
586	BCAT1	branched chain amino acid transaminase 1 [Source:HGNC Symbol;Acc:HGNC:976]
65263	PYCR3	pyrroline-5-carboxylate reductase 3 [Source:HGNC Symbol;Acc:HGNC:25846]
